# Supplementary material for: Activating and optimizing MoS2 basal planes for hydrogen evolution through the formation of strained sulphur vacancies
Source: Springer Nature journal article supplement (doi:10.1038/nmat4465), 2015-11-09
Supplement: 41563_2016_BFnmat4465_MOESM21_ESM.pdf [file 41563_2016_BFnmat4465_MOESM21_ESM.pdf]

# Activating and optimizing MoS<sub>2</sub> basal planes for hydrogen evolution through the formation of strained sulphur vacancies

Hong Li<sup>1†</sup>, Charlie Tsai<sup>2,3†</sup>, Ai Leen Koh<sup>4</sup>, Lili Cai<sup>1</sup>, Alex W. Contryman<sup>5,6</sup>, Alex H. Fragapane<sup>5,6</sup>, Jiheng Zhao<sup>1</sup>, Hyun Soo Han<sup>1</sup>, Hari C. Manoharan<sup>5,7</sup>, Frank Abild-Pedersen<sup>3</sup>, Jens K. Nørskov<sup>2,3\*</sup> and Xiaolin Zheng<sup>1\*</sup>

<sup>1</sup>Department of Mechanical Engineering, Stanford University, Stanford, California 94305, United States

<sup>2,3</sup>SUNCAT Center for Interface Science and Catalysis, Department of Chemical Engineering, Stanford University, 450 Serra Mall, Stanford, California 94305, United States

<sup>3</sup>SUNCAT Center for Interface Science and Catalysis, SLAC National Accelerator Laboratory, 2575 Sand Hill Road, Menlo Park, California 94025, United States

<sup>4</sup>Stanford Nanocharacterization Laboratory, Stanford University, California 94305, United States

<sup>5</sup>Stanford Institute for Materials and Energy Sciences, SLAC National Accelerator Laboratory, 2575 Sand Hill Road, Menlo Park, California 94025, United States

<sup>6</sup>Department of Applied Physics, Stanford University, Stanford, California 94305, United States

<sup>7</sup>Department of Physics, Stanford University, Stanford, California 94305, United States

\*e-mail: Jens K. Nørskov: [norskov@stanford.edu](mailto:norskov@stanford.edu), Xiaolin Zheng: [xlzheng@stanford.edu](mailto:xlzheng@stanford.edu)

† These authors contributed equally to this work

## Supplementary Figures

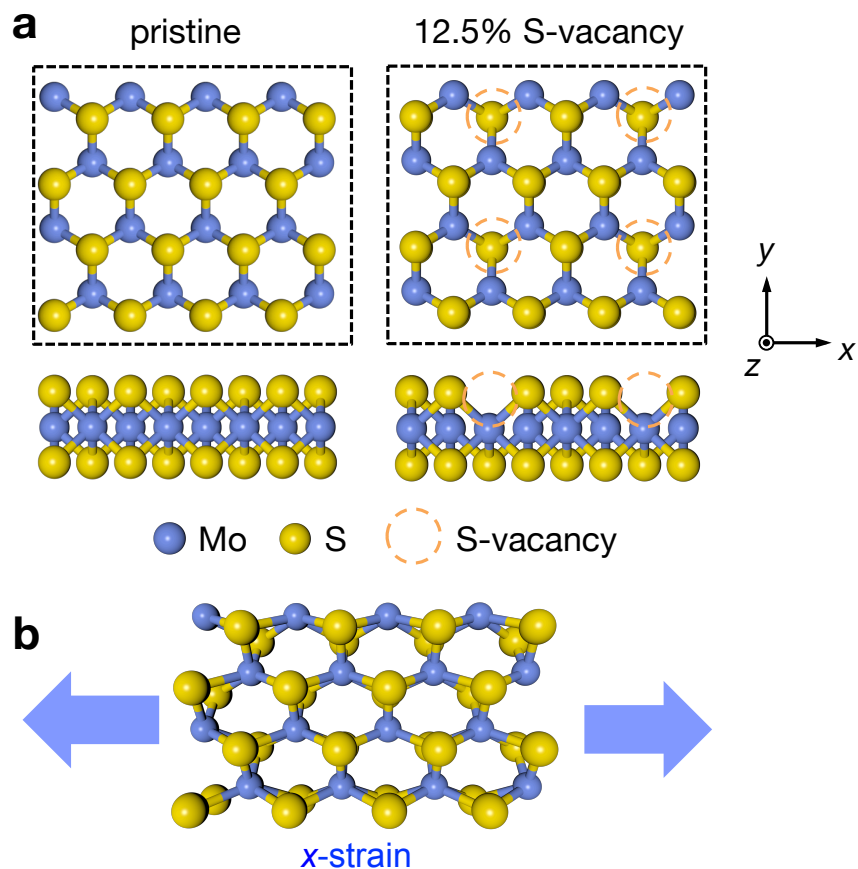

**Supplementary Figure S1| Computational unit cell of 2H-MoS<sub>2</sub>.** **a**, Top view (upper panel) and side view (lower panel) of the atomic structures of the 2H-MoS<sub>2</sub> basal plane with 0% (left) and 12.5% S-vacancy (right). Dashed circles label the S-vacancy sites. Inset: the ( $x$ ,  $y$ ,  $z$ ) coordinates. **b**, The schematic of MoS<sub>2</sub> under uniaxial strain in the  $x$ -direction ( $x$ -strain). The arrows indicate the directions of elastic strain.

**a**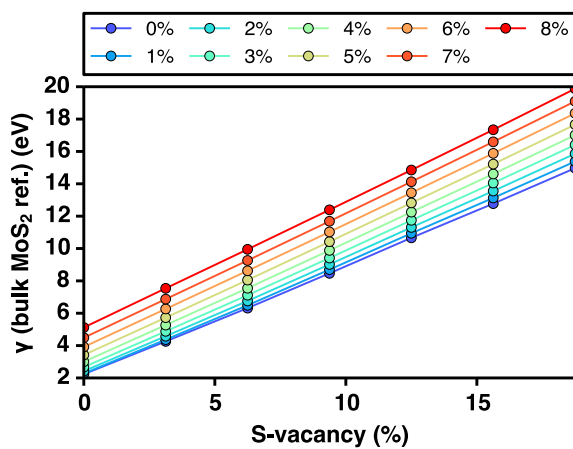**b**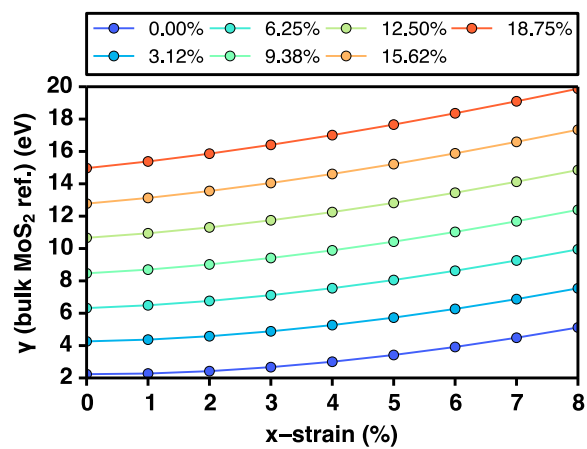

**Supplementary Figure S2| Vacancy and strain-dependent stability of MoS<sub>2</sub>.** The surface energy  $\gamma$  (*w.r.t.* bulk MoS<sub>2</sub>) per unit cell versus **a**, %S-vacancy at various uniaxial strains from 0 to 8%, and **b**, uniaxial x-strain with S-vacancy ranging from 0 to 18.75%.

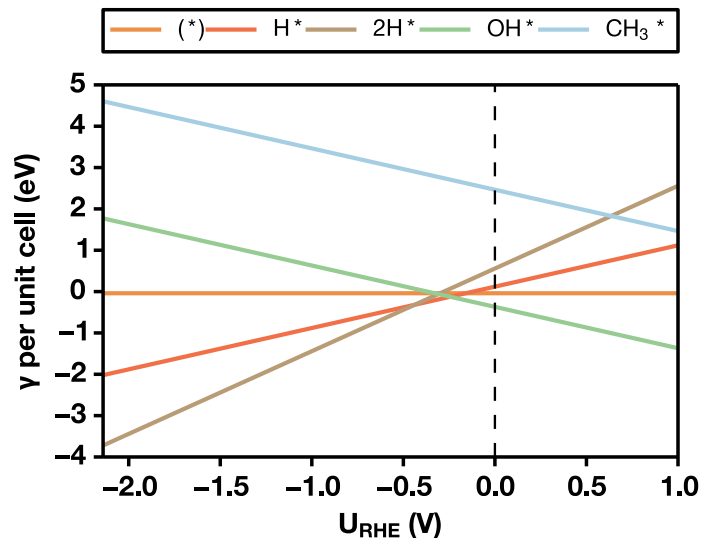

**Supplementary Figure S3| Surface energy diagram for adsorbed species on the S-vacancies.**

Plot of the calculated surface energy ( $\gamma$ ) per unit cell as a function of the applied potential versus RHE. An empty S-vacancy site is denoted as (\*) and its surface energy  $\gamma$  is set to be 0 eV. Adsorbed species are denoted by \*. The thermodynamically preferred surface species is H\* under negative potentials and is switched to OH\* at near-zero or positive potentials. Dissociated hydrocarbons such as CH<sub>3</sub>\* are not stable under any operating potentials.

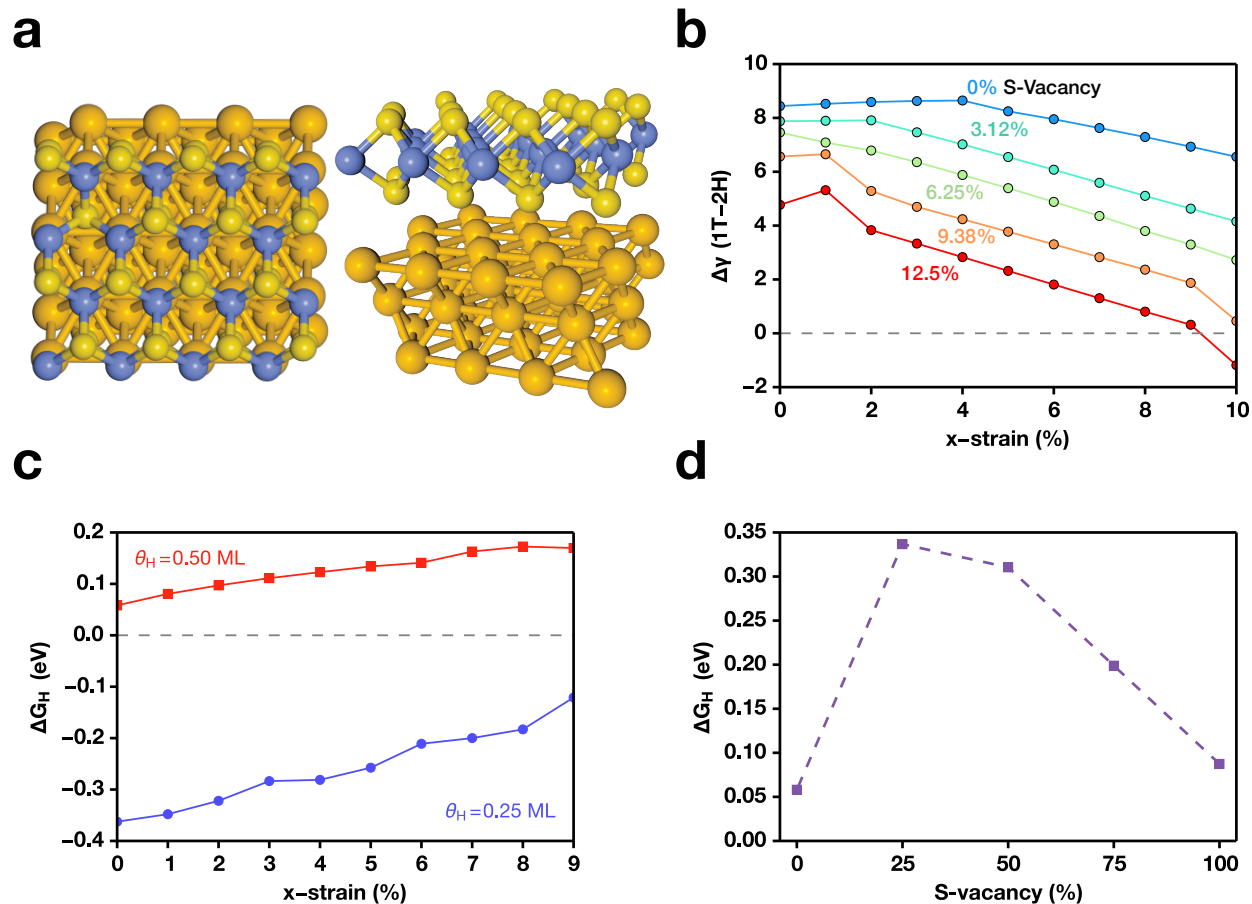

**Supplementary Figure S4 | Additional factors that could influence the activity of the S-vacancies.** **a**, Top view and angled view of  $2H$ - $\text{MoS}_2$  supported on  $\text{Au}(111)$ . The  $\text{Au}(111)$  support has been strained to match the  $2H$ - $\text{MoS}_2$  lattice. **b**, The difference in surface energy between the  $1T$ - $\text{MoS}_2$  and the  $2H$ - $\text{MoS}_2$  phases as a function of uniaxial  $x$ -strain, under a range of S-vacancies from 0% to 12.5%. The  $\Delta\gamma (1T-2H) > 0$  indicates that the  $2H$ -phase is thermodynamically more stable than  $1T$ -phase. **c**, Change in  $\Delta G_H$  on the Mo-edge of  $2H$ - $\text{MoS}_2$  due to elastic strain at two relevant hydrogen coverages  $\theta_H$  of 0.25 ML and 0.50 ML. **d**, Change in  $\Delta G_H$  on the Mo-edge of  $2H$ - $\text{MoS}_2$  due to the formation of S-vacancies.

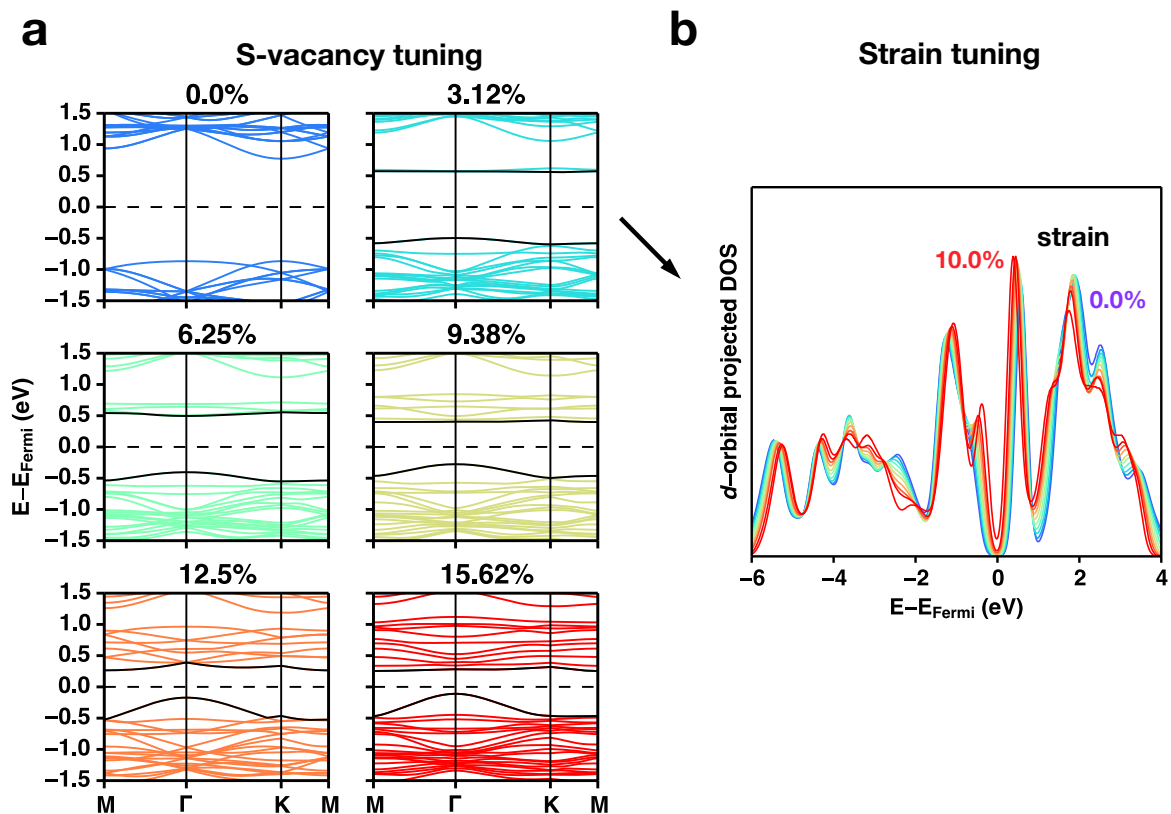

**Supplementary Figure S5| Electronic structures of MoS<sub>2</sub> with S-vacancies.** **a.** Evolution of the band structure with increasing S-vacancy concentration (indicated by %). New bands are introduced when S-vacancies are present, and the ones closest to the Fermi level are highlighted in black. **b.** *d*-orbital projected density of states (DOS) where S-vacancy equals 3.12%, showing the effect from strain-tuning. The full 4×4 computational unit cell was used for these calculations.

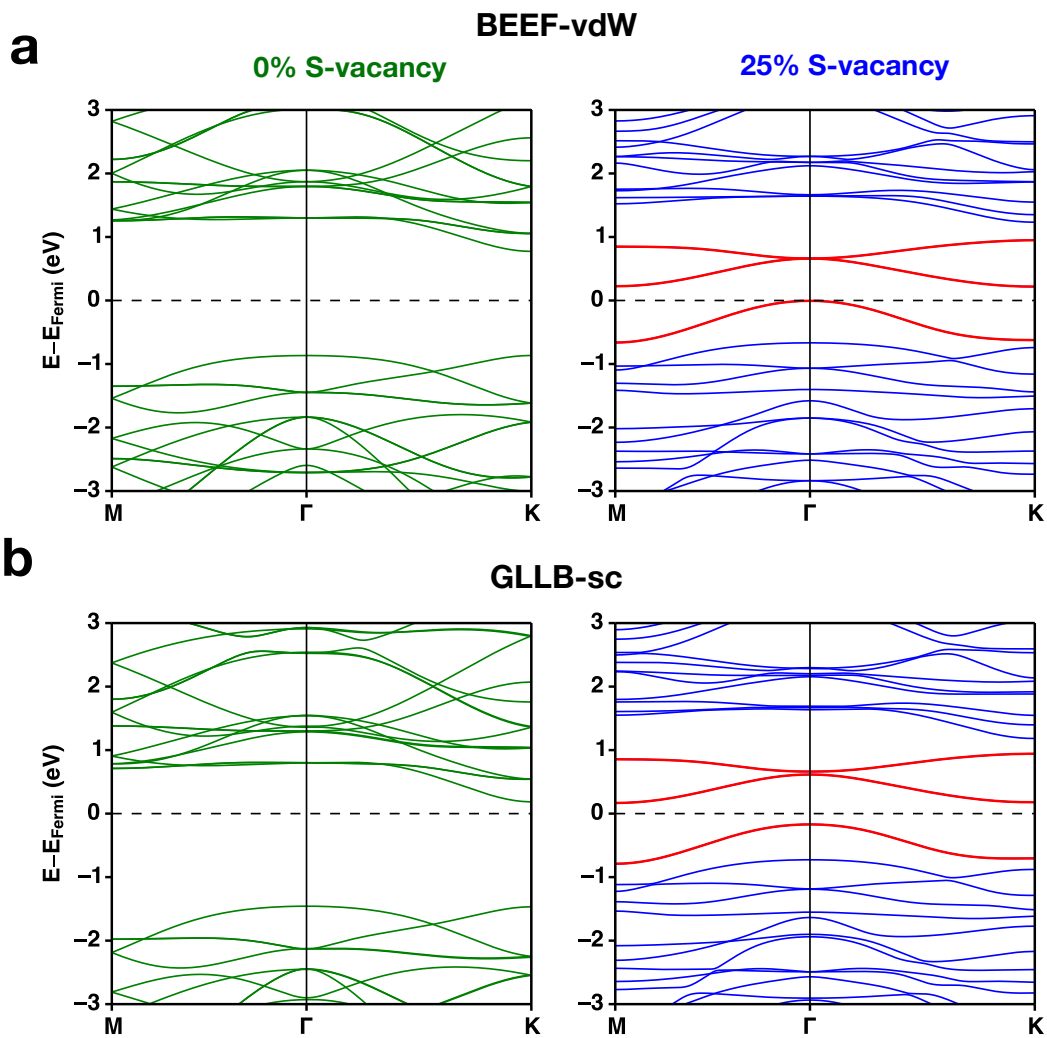

**Supplementary Figure S6| Benchmark comparison for band structures.** Comparison between the band structures of pristine MoS<sub>2</sub> and MoS<sub>2</sub> with 25% S-vacancies calculated using **a**, BEEF-vdW and **b**, GLLB-sc. New bands associated with the formation of S-vacancies are highlighted in red. The qualitative features are consistent and the band gaps are similar. A reduced 2×2 unit cell was used for these calculations.

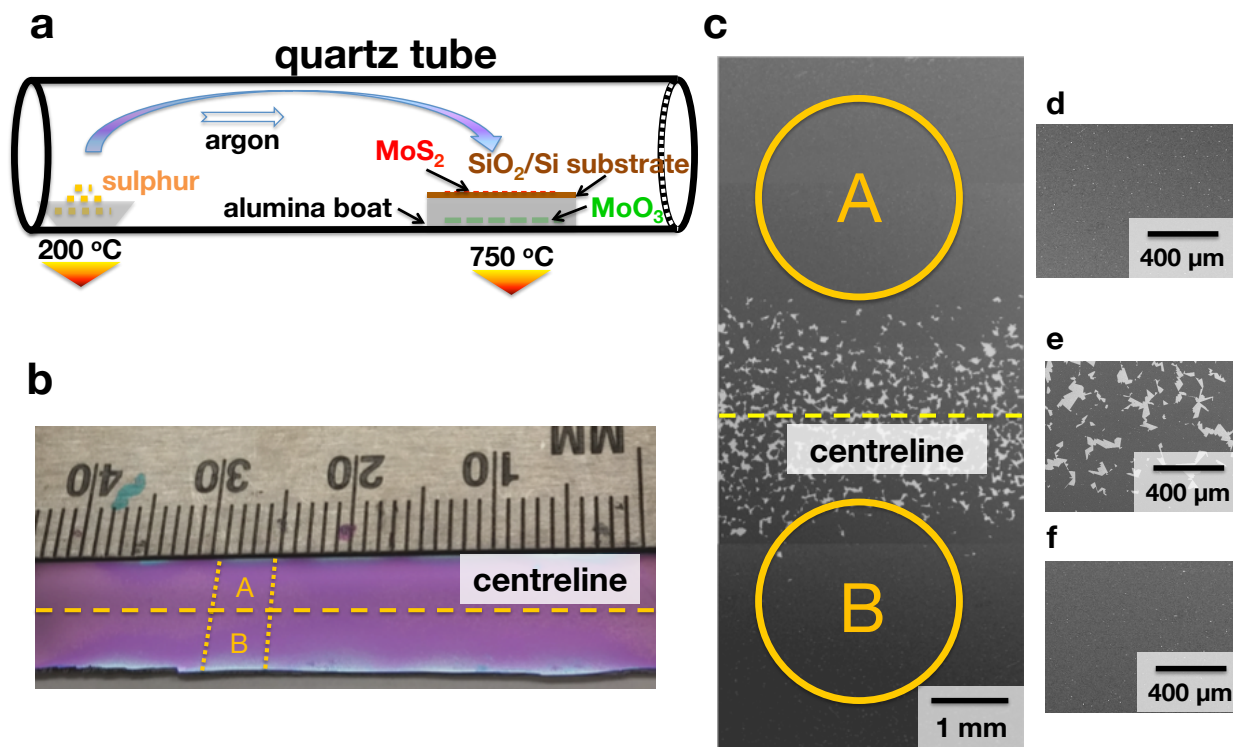

**Supplementary Figure S7 | Synthesis of continuous MoS<sub>2</sub> monolayer film.** **a**, Schematic of the CVD setup for growing MoS<sub>2</sub>. **b**, An optical image of a representative as-grown MoS<sub>2</sub> on a Si/SiO<sub>2</sub> wafer. **c**, A merged SEM image that consists of 4 individual SEM images showing large-area (between the vertical dotted lines in **(b)**) continuous MoS<sub>2</sub> film that is symmetric *w.r.t.* the centreline of the wafer (dashed lines in **(b)** and **(c)**). The circles A and B delineate the areas for HER measurement. The zoomed-in SEM images of the **d**, continuous film in region A, **e**, discrete flakes near the centreline, and **f**, continuous film in region B. The discrete MoS<sub>2</sub> flakes **(e)** show that the average flake size is about 100 ~ 400 μm.



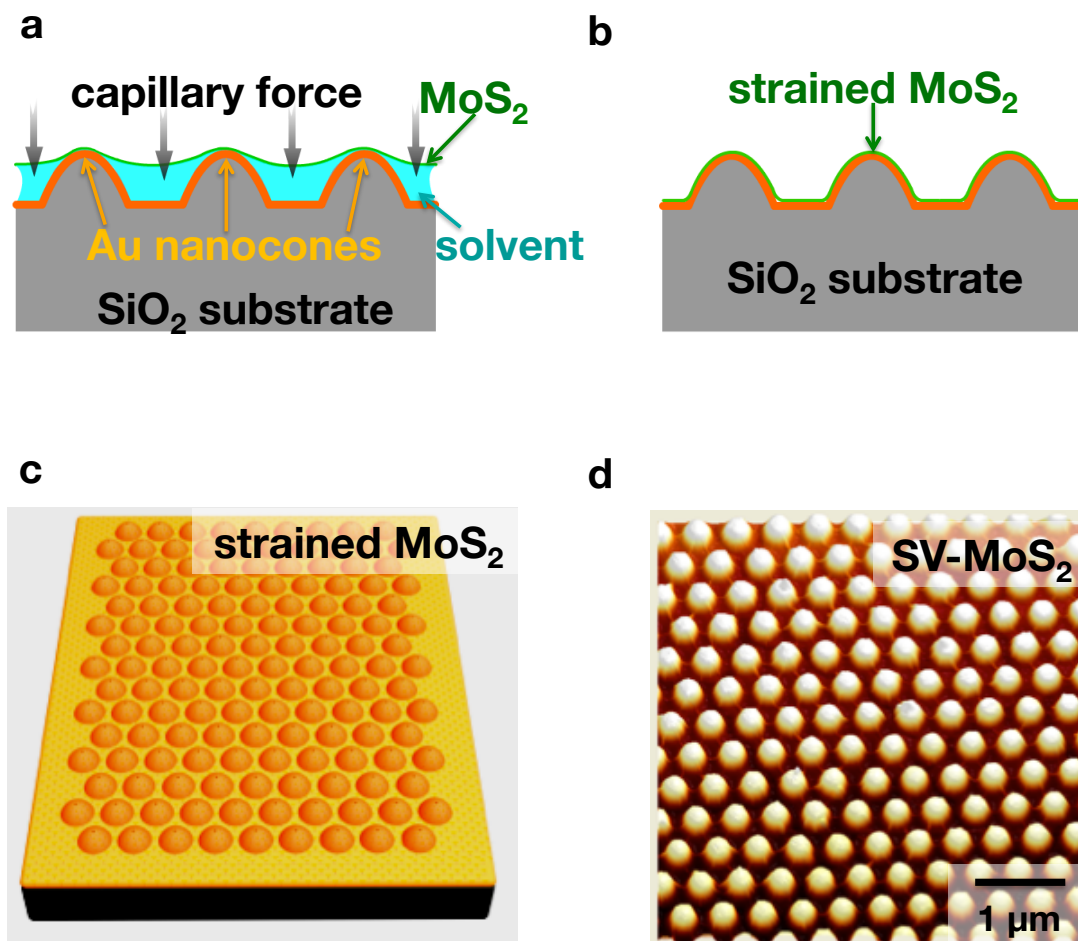

**Supplementary Figure S8| Capillary-force induced strain in MoS<sub>2</sub>.** Schematic side view of **a**, the capillary-force induced straining process of MoS<sub>2</sub> where arrows indicate the direction of capillary force, and **b**, the strained MoS<sub>2</sub> conformally coated on Au nanocones. **c**, Schematic perspective view of strained MoS<sub>2</sub> on a Au nanocone array. **d**, Atomic force microscopy image of strained MoS<sub>2</sub> with S-vacancies (SV-MoS<sub>2</sub>) on Au nanocones. Scale bar is 1 μm.

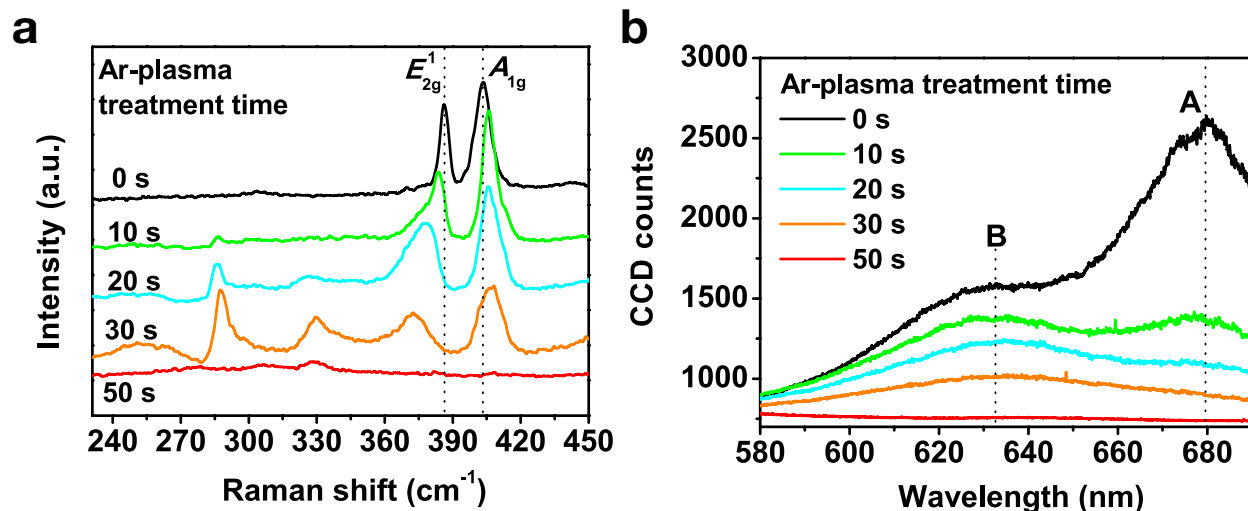

**Supplementary Figure S9 | Raman and photoluminescence spectroscopy characterizations of MoS<sub>2</sub> with S-vacancies.** **a**, Raman spectra of MoS<sub>2</sub> upon exposure of Ar plasma for 0 (no exposure), 10, 20, 30 and 50 seconds, respectively, from top to bottom. The peaks at 386 and 404 cm<sup>-1</sup> are assigned to the  $E_{2g}^1$  and  $A_{1g}$  modes, respectively. **b**, Photoluminescence spectra of MoS<sub>2</sub> upon exposure of Ar plasma for 0 (no exposure), 10, 20, 30 and 50 seconds, respectively, from top to bottom. The peaks at 680 and 633 nm correspond to the A and B exciton peaks, respectively.

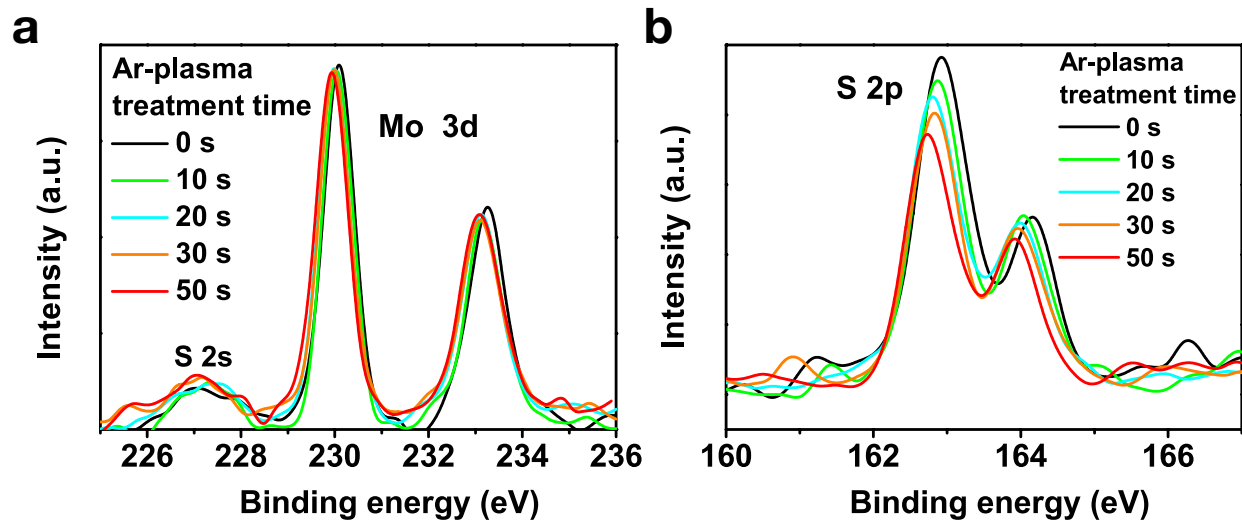

**Supplementary Figure S10 | X-ray photoelectron spectroscopy characterizations of MoS<sub>2</sub> with S-vacancies.** A representative set of X-ray photoelectron spectroscopy spectra of **a**, the Mo 3d states, and **b**, the S 2p state of MoS<sub>2</sub> upon exposure of Ar plasma for 0 (no exposure), 10, 20, 30 and 50 seconds, respectively. The feature of S 2s state are also seen in **(a)** on the left side of Mo 3d peak.

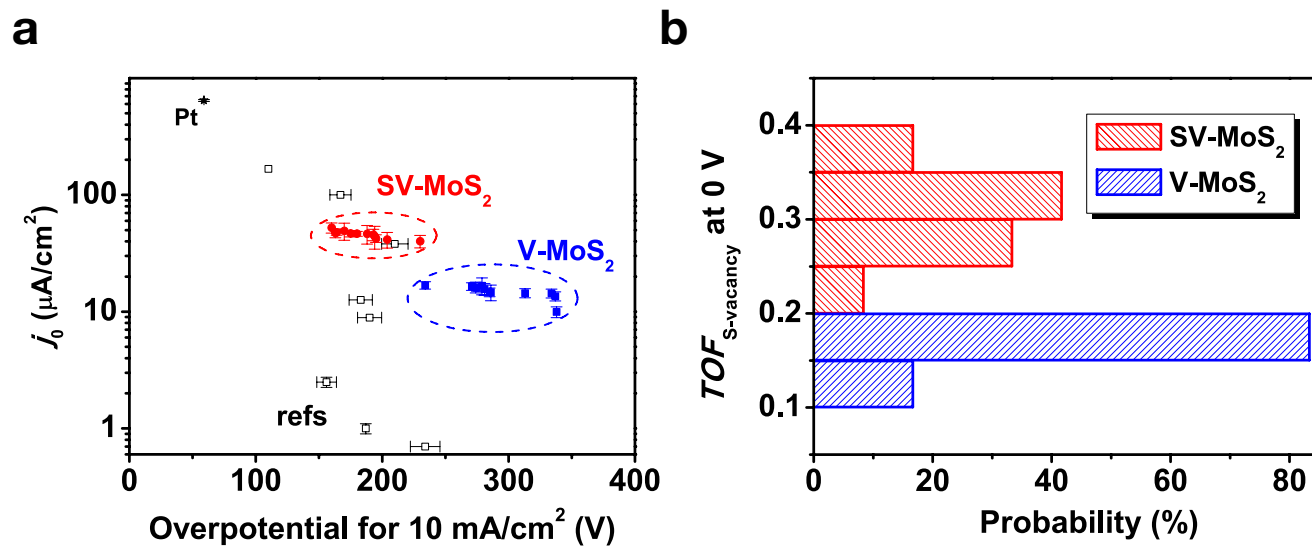

**Supplementary Figure S11 | Statistical summary of HER activity of MoS<sub>2</sub> with optimal S-vacancy (12.5 ± 2.5%).** **a**, Exchange current density  $j_0$  versus overpotential for 10  $\text{mA}/\text{cm}^2$ , along with reported values (Supplementary refs 1-8). **b**, Distribution of turnover frequency per S-vacancy  $TOF_{\text{S-vacancy}}$  at 0 V versus RHE of V-MoS<sub>2</sub> and SV-MoS<sub>2</sub> samples in (a).

## Supplementary Note 1: Theoretical Approach

### *Calculation details*

All calculations were performed using plane-wave density functional theory (DFT) employing periodic boundary conditions using the Quantum ESPRESSO code<sup>9</sup>. The Bayesian error estimation exchange-correlation functional with van der Waals interactions<sup>10</sup> (BEEF-vdW) was used. This functional has been optimized for chemisorption energies as well as van der Waals interactions, and previous results using both the RPBE and BEEF-vdW functional have been found to be in close agreement<sup>11,12</sup>. A plane-wave cutoff of 500 eV and a density cutoff of 5000 eV were used, and a Monkhorst-Pack<sup>13</sup>  $2 \times 2 \times 1$   $k$ -point grid was used to sample the Brillouin zone. Periodic boundary conditions were used in all directions and 11 Å of vacuum was used in the  $z$ -direction to separate the slabs. The convergence criterion for the structural optimizations was a maximum force of 0.05 eV/Å. The lattice parameters were determined to be  $a = 3.21$  Å and  $c = 13.05$  Å from previous calculations<sup>12</sup>, which were in close agreement with experimental values.

Supplementary Figure S1 shows the computational unit cell (Supplementary Figure S1a) with uniaxial tensile strain along the  $x$ -axis (Supplementary Figure S1b). Elongating the unit cell in the  $x$ -direction increased elastic strain correspondingly. In this unit cell size, S-vacancy concentrations in increments of 3.12% (Supplementary Figure S2) are possible, where the S-vacancy % is defined as the total number of S-vacancies divided by the total number of S atoms in the pristine basal plane.

Although standard DFT is known to be poor for estimating the band gap, the GLLB-sc exchange-correlation functional has been shown to be accurate<sup>14,15</sup>. We used the GLLB-sc functional as implemented in the grid-based projector augmented wave code GPAW<sup>16,17</sup>, using a 0.15 Å grid spacing. Either the full  $4 \times 4$  unit cell or a reduced  $2 \times 2$  unit cell was used to calculate the band structures. The reduced cell was used to obtain a large concentration of S-vacancies in a small unit cell, which simplifies the band structure.

### ***Hydrogen adsorption free energy***

The hydrogen adsorption free energies,  $\Delta G_H$ , were determined in the same way as in previous studies<sup>18,19</sup>. The adsorption energy is defined as

$$\Delta E_H = E(\text{MoS}_2+\text{H}) - E(\text{MoS}_2) - \frac{1}{2} E(\text{H}_2) \quad (1)$$

where (MoS<sub>2</sub>+H) refers to hydrogen adsorbed on the MoS<sub>2</sub> surface, (MoS<sub>2</sub>) refers to a clean MoS<sub>2</sub> surface, and H<sub>2</sub> refers to gas phase hydrogen molecule. The hydrogen adsorption free energy was calculated at zero potential and pH = 0 as

$$\Delta G_H = \Delta E_H + \Delta E_{\text{ZPE}} - T\Delta S \quad (2)$$

where  $\Delta E_H$  is the hydrogen adsorption energy,  $\Delta E_{\text{ZPE}}$  is the difference in zero point energy,  $T$  is the temperature (300 K) and  $\Delta S$  is the difference in entropy between H that is adsorbed and in the gas phase, at 101325 Pa. A normal mode analysis was used to determine the vibrational frequencies of the adsorbed species, which were used to determine the zero point energy correction and the entropy. The adsorption is too strong if  $\Delta G_H$  is very negative or too weak if  $\Delta G_H$  is very positive.

### ***Atomic structures with S-vacancies and strain***

Each unit cell consists of 16 Mo atoms and 32 S atoms on the surface. Assuming that S-vacancies are only formed on the surface (top side of the monolayer). With the %S-vacancy being defined as (number of S-vacancies)/(number of total S atoms), this allows us to have increments of 3.125% for one more S-vacancy. Thus having four S-vacancies corresponds to 12.5%. All subsequent S-vacancies from the first one were spaced out as far as possible from existing S-vacancies. To include the effect of strain, the unit cell size was varied *w.r.t.* the optimized lattice parameters. For the range of S-vacancies and strains considered in this work, we observe no noticeable rearrangements in the geometry.

### ***Calculation of stability***

Following previous work<sup>20</sup>, the surface energies were determined relative to the bulk 2H-MoS<sub>2</sub>,

$$\gamma = E_{\text{tot}} - N_{\text{Mo}} E_{\text{bulk}}^{\text{MoS}_2} + (2N_{\text{Mo}} - N_{\text{S}})\mu_{\text{S}} - N_{\text{H}}\mu_{\text{H}} \quad (3)$$

where  $E_{\text{tot}}$  is the total energy of the unit cell,  $N$  refers to the number of each species in the unit cell, and  $\mu$  refers to the chemical potential for each species. The surface energy  $\gamma$  is determined per unit cell size. The effect of strain and S-vacancy on the surface energy  $\gamma$  is shown in Supplementary Figure S2. In all cases, increasing strain and S-vacancy raises the surface energy noticeably, and this dependence is more pronounced for the formation of S-vacancies.

### ***Evaluating the possible surface species on the S-vacancies***

To determine whether other species could compete with proton adsorption on the S-vacancies of MoS<sub>2</sub>, we have constructed a surface energy diagram for the MoS<sub>2</sub> surface with S-vacancies (Supplementary Figure S3). In an aqueous environment, when the applied potential is below -0.24 V versus RHE, the most thermodynamically stable surface species is a single adsorbed hydrogen in the S-vacancy, H\* (red line in Figure S3) and then two adsorbed hydrogen atoms at even lower potentials (brown line in Figure S3). When the applied potential is at near-zero or positive potentials, the OH\* (green line in Figure S3) and H\* covered surfaces are similar in energy (within 0.5 eV of each other) and OH\* could compete with H\* to adsorb on the S-vacancies sites. For an OH\* covered surface,  $\Delta G_{\text{H}}$  of the H in the OH\* was calculated to be 1.18 eV, indicating that the oxygen poisoned S-vacancies are catalytically inert. This is expected, as O\* adsorption on the S-vacancy is similar to that of S\*, resulting in comparable inertness. Since we observe large increases in the activity, this is further evidence that significant concentrations of OH\* are not expected on the surface. We also considered the possibility of hydrocarbon impurities coming from the PMMA process. Hydrocarbon impurities such as CH<sub>4</sub> could dissociatively adsorb into CH<sub>3</sub>\* and ½ H<sub>2</sub> (g), but they bind more weakly than either OH\* or H\*. Hence, the S-vacancy sites are expected to be preferentially occupied by H\* under our operating conditions.

### ***Influence of the MoS<sub>2</sub>-Au substrate interactions on $\Delta G_{\text{H}}$***

It is difficult to probe the effect of the MoS<sub>2</sub>-Au coupling experimentally, so we have performed DFT calculations to quantify the substrate's effect on the hydrogen binding energy. By using the BEEF-vdW exchange-correlation functional, we are able to accurately describe the van der Waals physisorption of the MoS<sub>2</sub> monolayer as well as the hydrogen chemisorption in the S-vacancy. For the model system, we considered 2H-MoS<sub>2</sub> with 3.12% S-vacancies supported on

Au(111) (Supplementary Figure S4a), where the Au(111) slab was strained to match the lattice parameters of  $2H$ -MoS<sub>2</sub>. We find that  $\Delta G_H$  in the S-vacancy changes from 0.176 eV (free standing) to 0.151 eV (supported). The difference in  $\Delta G_H$  is only 0.025 eV, and the true change in  $\Delta G_H$  due to interactions between Au(111) and  $2H$ -MoS<sub>2</sub> is expected to be even smaller since Au(111) becomes more reactive when it is strained<sup>21</sup>. Hence, we expect that the MoS<sub>2</sub>-Au substrate coupling would neither alter the trends in the S-vacancy and strain nor modify the requirements for achieving the optimum value of  $\Delta G_H = 0$  eV.

### ***Possibility of MoS<sub>2</sub> phase transformations due to S-vacancies and strain***

Although we have not observed large distortions in the  $2H$ -MoS<sub>2</sub> monolayers either experimentally or theoretically, we still considered if phase transformations from the  $2H$ -phase to the  $1T$ -phase become more likely due to S-vacancies and applied elastic strain. Using DFT calculations, we find that while both S-vacancies and elastic strain lower the difference in energy between the  $1T$ -phase and  $2H$ -phase, the  $1T$ -phase is still less stable than the  $2H$ -phase (Supplementary Figure S4b). Thus, we don't expect phase changes to play a significant role in our system.

### ***Effect of strain and S-vacancies on the edge-sites***

In order to minimize the exposure of edge-sites and to focus on the basal plane, we have synthesized and tested large uniform monolayers of  $2H$ -MoS<sub>2</sub> in our experiments. However, to further determine the influence of strain and S-vacancies on the edges, DFT calculations were performed for the edges as well. We have used the same computational setups as in previous work<sup>12,18,19</sup>. The Mo-edge has been found to be the relevant edge in HER, where the hydrogen adsorption at a hydrogen coverage ( $\theta_H$ ) of half a H monolayer (ML),  $\theta_H = 0.5$  ML is 0.06 eV and is the active species. We determined the change in  $\Delta G_H$  due to strain at both  $\theta_H = 0.5$  ML and a lower coverage of  $\theta_H = 0.25$  ML and find that hydrogen adsorption is weakened in both cases (Supplementary Figure S4c). Since at  $\theta_H = 0.5$  ML,  $\Delta G_H$  on the edge-sites is on the weak side without elastic strain, hydrogen adsorption only becomes less favourable when strain is applied. Since the hydrogen at lower coverage ( $\theta_H = 0.25$  ML) is on the strong side without elastic strain, the hydrogen binding becomes closer to 0 eV when strain is applied. However, even at 8% strain,



which is far beyond what has been considered in this work,  $\Delta G_{\text{H}}$  is still further from 0 eV than that of the 0.5 ML case without strain, *i.e.* a completely unstrained edge. Hence, the observed increase in HER activity for our strained MoS<sub>2</sub> could not be due to strained edge-sites. In addition, the effect of S-vacancies on  $\Delta G_{\text{H}}$  in the edges was also considered (Supplementary Figure S4d), where  $\Delta G_{\text{H}}$  was worse than the pristine edge for S-vacancy concentrations between 25% (isolated S-vacancy in a unit cell) to 100% (all S-atoms at the edges removed). Any formation of S-vacancies on exposed edges is thus also not expected to contribute to increases in the HER activity.

### ***Electronic structure of the S-vacancy***

The evolution of the band structure with increasing S-vacancy concentration is shown in Supplementary Figure S5a. When S-vacancies are introduced, new bands appear above and below the Fermi level. Further increases in the S-vacancy concentration shift these bands towards the Fermi level and thus increase the number of electronic states around the Fermi level. The effect of applying tensile strain is shown in Supplementary Figure S5b, where the density of states (DOS) becomes narrower and the electronic states around the Fermi level increase. These new mid-gap states are also experimentally confirmed by scanning tunnelling microscopy/spectroscopy measurements of MoS<sub>2</sub> with S-vacancies, which is discussed below in Supplementary Note 2.

### ***Comparison between BEEF-vdW and GLLB-sc***

Band structure calculations were performed using the BEEF-vdW exchange-correlation functional in order to be consistent with all other calculations in this manuscript. To confirm whether or not the band structures are reasonable, we compared the results with ones that are calculated using the GLLB-sc exchange-correlation functional, which is known to accurately reproduce band gaps for semiconductors. In Supplementary Figure S6, the qualitative features of the BEEF-vdW (Supplementary Figure S6a) and GLLB-sc (Supplementary Figure S6b) band structures are similar, and both band gaps are also similar (~1.7 eV).

## Supplementary Note 2: Experimental details

### ***Growth of monolayer 2H-MoS<sub>2</sub> using chemical vapour deposition (CVD) method***

Molybdenum trioxide (MoO<sub>3</sub>) and sulphur powder were used as the precursors for MoS<sub>2</sub>. MoO<sub>3</sub> (< 1 mg) powder was loaded in a ceramic boat. A piece of Si wafer capped with 270-nm-thick SiO<sub>2</sub> layer was suspended on the ceramic boat. Then the ceramic boat was put at the centre of a 1-inch quartz tube furnace. Another ceramic boat containing sulphur powder (~ 1g) was placed upstream (Supplementary Figure S7a). The quartz tube was repeatedly pumped down to 0.01 mbar and subsequently filled with Ar gas (100 sccm) to 1 atm for three times to purge the oxygen molecules in the tube. Then the tube was heated to 400 °C and the Ar flow rate was set to 6 sccm. Afterward, the sulphur boat was moved to a heating zone that reaches 200 °C during the growth. The temperature in the centre of the tube was then increased to 750 °C and maintained at 750 °C for 15 min. Finally, the system was naturally cooled down to room temperature while in the presence of Ar flow.

As shown in Supplementary Figure S7b, MoS<sub>2</sub> flakes are grown over a large area (~10-mm-wide and 50-mm-long) and the growth is symmetric *w.r.t.* the centreline of the wafer (Supplementary Figure S7c). Raman characterization across the wafer surface shows the majority of the film consists of monolayer MoS<sub>2</sub> (> 90%). The density of MoS<sub>2</sub> flakes decreases gradually from edge to the centreline of the wafer since the MoO<sub>3</sub> vapour concentration is higher at the wafer edges and lower near the centre. The discontinuous MoS<sub>2</sub> flakes near the centreline (Supplementary Figure S7c) have sizes around 100 ~ 400 μm (Supplementary Figure S7e), and the MoS<sub>2</sub> flakes away from the centreline are continuous (Supplementary Figures S7d and S7f). We typically chose the symmetric and continuous regions A and B (Supplementary Figure S7c) for HER experiments. Assuming that connected equilateral-triangle flakes of side length L~100 μm cover the entire area of measurement, the total density of edge-site S atoms is on the order of ~10<sup>10</sup> sites/cm<sup>2</sup>, which is only 10<sup>-4</sup> of the total density of S-vacancy sites (~10<sup>14</sup> sites/cm<sup>2</sup>, see later discussion). We therefore neglect the contribution of edge-sites towards HER activity in our sample. It is worth noting that the mass loadings of these HER electrodes are extremely small (only three atomic layers of S-Mo-S).

### ***Capillary-force induced strain in MoS<sub>2</sub>***

Monolayer polystyrene nanospheres (diameters  $\sim 500$  nm) were assembled on a Si/SiO<sub>2</sub> (270 nm) wafer by either the spin coating or using the Langmuir-Blodgett method. Afterward, the size of the nanospheres was reduced to 250 nm using oxygen plasma. The nanospheres were used as a mask for the plasma etching of SiO<sub>2</sub> in a mixture of fluorocarbon and oxygen and then removed by sonication in chloroform. Subsequently, a titanium (10 nm)/gold (80 nm) bilayer was deposited onto the SiO<sub>2</sub> nanocones to form the gold nanocone substrate. The CVD monolayer MoS<sub>2</sub> was coated with 1  $\mu\text{m}$ -thick PMMA, removed from the growth substrate by potassium hydroxide (KOH) etching. After the SiO<sub>2</sub> layer was etched away, the PMMA-MoS<sub>2</sub> film floated on the surface and was carried up using the gold nanocone substrate to complete the transfer. The sample was then baked at 100 °C for 10 min and then subsequently soaked in acetone and chloroform sequentially to remove PMMA completely. Afterward, the sample was soaked in ethylene glycol under vacuum for 1 hour to ensure both sides of MoS<sub>2</sub> membrane were wetted by ethylene glycol. Lastly, the sample was dried in air to evaporate the ethylene glycol completely. The capillary force induced by ethylene glycol evaporation pulls the MoS<sub>2</sub> membrane down to follow the topography of the nanocone surface (see Supplementary Figure S8, more details can be found in our previous work<sup>22</sup>). Tensile strain is thus created in MoS<sub>2</sub>.

### ***Transmission electron microscopy (TEM) characterization of MoS<sub>2</sub> with S-vacancies***

The as-grown MoS<sub>2</sub> film was transferred to a TEM grid using the same PMMA-assisted transfer method discussed earlier. Then the sample was treated with mild Ar plasma to create S-vacancies. The sample on the TEM grid was characterized with a FEI spherical aberration (image)-corrected 80-300 Titan environmental (scanning) (FEI Titan E-(S)TEM) operated at 80 kV. It is noted that serious line defects<sup>23</sup> can be found when the electron beam exposure time was over 60 s. In order to minimize such knock-on damage, the electron beam exposure time was limited to 20 s for each region of the specimen investigated. We noted that when the Ar-plasma treatment time was increased to 50 s, the film became unstable in TEM and holes were soon formed upon the electron beam exposure.

### ***Raman and photoluminescence (PL) characterization of MoS<sub>2</sub> with S-vacancies***

The as-grown MoS<sub>2</sub> film was transferred to a clean SiO<sub>2</sub> wafer using the same PMMA-assisted transfer method. The transferred MoS<sub>2</sub> samples were exposed to mild Ar plasma for various durations. The Raman and PL measurements were performed with the excitation laser line of 532 nm using a WITEC alpha500 Confocal Raman system in ambient air environment. The power of the excitation laser line was kept well below 1 mW to avoid damage of MoS<sub>2</sub>. The Raman scattering was collected by an Olympus 100 × objective (N.A. = 0.9) and dispersed by 1800 (for Raman measurements) and 600 (for PL measurements) lines/mm gratings.

The as-transferred MoS<sub>2</sub> shows typical Raman spectra of monolayer MoS<sub>2</sub> that consists of two dominant peaks at 385.9 ( $E_{2g}^1$ , the in-plane vibration mode) and 404 cm<sup>-1</sup> ( $A_{1g}$ , the out-of-plane vibration mode), as shown in Supplementary Figure S9a. The difference in frequency is about 18 cm<sup>-1</sup>, a unique Raman feature of monolayer MoS<sub>2</sub><sup>24</sup>. Upon the formation of S-vacancies, both  $E_{2g}^1$  and  $A_{1g}$  peaks broadened. This is due to perturbations to the perfect 2H-phase lattice, resulting in poorly defined vibrational mode energies, suggesting that the creation of vacancies changes the vibrational energies of the lattice. Moreover, red and blue shifts are observed for  $E_{2g}^1$  and  $A_{1g}$  peaks, respectively. This is caused by changes in the restoring force constant of these vibrational modes due to vacancy formation, providing further evidence that Mo-S bonds have been perturbed by the vacancies. Vacancy formation also causes additional peaks in the Raman spectrum. There is a broad peak between 240 and 260 cm<sup>-1</sup> that could be related to the physisorption of oxygen molecules on the sulphur vacancies in air<sup>25</sup>. Another additional peak at 287 cm<sup>-1</sup> is attributed to the  $E_{1g}$  mode that is normally not observable for the 2H-phase using a back-scattering setup<sup>26</sup>, and its presence could be caused by the bond-angle rearrangement. The third additional peak 329 cm<sup>-1</sup> could arise from the other phase formation locally<sup>8</sup>.

The above analysis suggests that there are rearrangements of the Mo-S chemical bonds with increasing amounts of removed S atoms, and even possibly local phase transformations. Nevertheless,  $E_{2g}^1$  and  $A_{1g}$  peaks are still the strongest on the Raman spectra, indicating the monolayer MoS<sub>2</sub> is still dominantly 2H-phase.

The evolution of PL spectra is shown in Supplementary Figure S9b. The as-transferred MoS<sub>2</sub> shows two dominant emission peaks A and B, consistent with its monolayer nature. As the

Ar-plasma treatment duration increases, the intensity of the PL emission peak continuously decreases due to changes to the lattice structure, which agrees with previous findings<sup>27</sup>. The PL emission completely disappears when the plasma treatment duration is more than 50 s. These Raman and PL spectra shows that (1) the as-grown MoS<sub>2</sub> is monolayer; (2) atomic bond arrangements change with varying plasma treatment time, resulting in electronic structure changes; and (3) severe atomic rearrangement/reconstruction could occur with prolonged plasma treatment. Most importantly, the gradual evolution of both Raman and PL spectra suggests that the desulfurization process was well controlled.

### ***X-ray photoelectron spectroscopy (XPS) characterization of MoS<sub>2</sub> with S-vacancies***

The as-grown MoS<sub>2</sub> film was transferred onto a gold substrate using the same PMMA-assisted transfer method. The transferred MoS<sub>2</sub> film was treated with Ar plasma for various durations to create different concentration of S-vacancies. The XPS measurements were performed at  $5 \times 10^{-10}$  Torr using excitation by Al(K $\alpha$ ) radiation. The normalized spectra of the Mo 3d state and S 2p state are shown in Supplementary Figures S10a and S10b. First, the Mo 3d peak remains almost unchanged with different Ar-plasma treatment time, which suggests that Ar plasma has little influence on the Mo atoms, and it is consistent with the absence of Mo vacancy in the TEM image (main Figure 3e). Second, the S 2p peak intensity does decrease with increasing the Ar-plasma treatment time (from top to bottom), indicating the formation of S-vacancy. To quantify the XPS information, we measured the XPS peak area ratio of S 2p to Mo 3d states for as-grown MoS<sub>2</sub> and normalized the value of S:Mo ratio to 2.0, and we use this as a reference to obtain the S:Mo atomic ratios for MoS<sub>2</sub> samples undergoing different Ar-plasma treatment times (main Figure 3f).

### ***Local electronic probe of MoS<sub>2</sub> with S-vacancies using scanning tunnelling microscopy***

Scanning tunneling microscopy/spectroscopy (STM/STS) was used to obtain the electronic structure of MoS<sub>2</sub> with S-vacancies directly. The STM/STS measurements were carried out at 77 K in ultrahigh vacuum. A MoS<sub>2</sub> sample with ~12.5% S-vacancies on a gold surface was prepared using the aforementioned process. The STS  $dI/dV$  was measured directly using a lock-in amplifier and modulating the sample bias at an amplitude of 10 mV. The measurements

were smoothed to remove noise. Figure 3g (main text) shows  $dI/dV$  versus the sample bias  $V$ , where  $dI/dV$  is proportional to the DOS<sup>28</sup>. The large, sharp peak inside the band gap region is attributed to the newly introduced electronic states by S-vacancies. This is in excellent qualitative agreement with the calculated projected  $d$ -orbital DOS (calculated on a freestanding monolayer) shown in the same figure, which has been shifted by  $-1.2$  eV to account for doping from the Au substrate (red curve in main Figure 3g).

### ***Calculation of the turnover frequency***

The turnover frequency is calculated using the current density  $j$  and the active site density  $N$  according to Supplementary Equation 4,

$$TOF = \frac{\text{Total number of H}_2 \text{ atoms per second}}{\text{Total number of active sites per unit area}} = \frac{j / (2 \times q)}{N} \quad (4)$$

where  $q = 1.6 \times 10^{-19}$  C is the elementary charge, and 2 accounts for 2 H atoms per H<sub>2</sub> molecule. To calculate the turnover frequency per surface Mo atom ( $TOF_{\text{Mo}}$ ), the Mo atom density ( $N_{\text{Mo}}$ ) is estimated to be about  $1 \times 10^{15}$  cm<sup>-2</sup> from the MoS<sub>2</sub> lattice constant  $\sim 3.2$  Å. To calculate the turnover frequency per S-vacancy site ( $TOF_{\text{S-vacancy}}$ ), the S-vacancy site density is estimated using Supplementary Equation 5,

$$N_{\text{S-vacancy}} = (2 \times N_{\text{Mo}}) \times (\% \text{S-vacancy}) \quad (5)$$

where (%S-vacancy) is the atomic S-vacancy percentage out of the total number of S atoms measured by XPS. There is a factor of 2 in Supplementary Equation 5 since we assume that only S atoms on top of monolayer MoS<sub>2</sub> are removed by Ar plasma according to our TEM image (main Figure 3e). This should give an upper bound for the density of S-vacancies and hence the lower bound of  $TOF_{\text{S-vacancy}}$ . To estimate  $TOF_{\text{S-vacancy}}$  at 0 V versus RHE, we used the exchange current density  $j_0$  that was linearly extrapolated from the Tafel plots for  $j$  in Supplementary Equation 4.

## Supplementary References

- 1 Xie, J. *et al.* Controllable Disorder Engineering in Oxygen-Incorporated MoS<sub>2</sub> Ultrathin Nanosheets for Efficient Hydrogen Evolution. *J. Am. Chem. Soc.* **135**, 17881-17888 (2013).
- 2 Li, Y. *et al.* MoS<sub>2</sub> Nanoparticles Grown on Graphene: An Advanced Catalyst for the Hydrogen Evolution Reaction. *J. Am. Chem. Soc.* **133**, 7296-7299 (2011).
- 3 Shi, J. *et al.* Controllable Growth and Transfer of Monolayer MoS<sub>2</sub> on Au Foils and Its Potential Application in Hydrogen Evolution Reaction. *ACS Nano* **8**, 10196-10204 (2014).
- 4 Wang, H. *et al.* Electrochemical tuning of vertically aligned MoS<sub>2</sub> nanofilms and its application in improving hydrogen evolution reaction. *Proc. Natl Acad. Sci. USA* **110**, 19701-19706 (2013).
- 5 Wang, H. *et al.* Electrochemical Tuning of MoS<sub>2</sub> Nanoparticles on Three-Dimensional Substrate for Efficient Hydrogen Evolution. *ACS Nano* **8**, 4940-4947 (2014).
- 6 Xie, J. *et al.* Defect-Rich MoS<sub>2</sub> Ultrathin Nanosheets with Additional Active Edge Sites for Enhanced Electrocatalytic Hydrogen Evolution. *Adv. Mater.* **25**, 5807-5813 (2013).
- 7 Kibsgaard, J., Chen, Z., Reinecke, B. N. & Jaramillo, T. F. Engineering the surface structure of MoS<sub>2</sub> to preferentially expose active edge sites for electrocatalysis. *Nat. Mater.* **11**, 963-969 (2012).
- 8 Lukowski, M. A. *et al.* Enhanced Hydrogen Evolution Catalysis from Chemically Exfoliated Metallic MoS<sub>2</sub> Nanosheets. *J. Am. Chem. Soc.* **135**, 10274-10277 (2013).
- 9 Giannozzi, P. *et al.* QUANTUM ESPRESSO: a modular and open-source software project for quantum simulations of materials. *J. Phys. Condens. Matter.* **21**, 395502 (2009).
- 10 Wellendorff, J. *et al.* Density functionals for surface science: Exchange-correlation model development with Bayesian error estimation. *Phys. Rev. B* **85**, 235149 (2012).
- 11 Hinnemann, B. *et al.* Biomimetic Hydrogen Evolution: MoS<sub>2</sub> Nanoparticles as Catalyst for Hydrogen Evolution. *J. Am. Chem. Soc.* **127**, 5308-5309 (2005).
- 12 Tsai, C., Abild-Pedersen, F. & Nørskov, J. K. Tuning the MoS<sub>2</sub> Edge-Site Activity for Hydrogen Evolution via Support Interactions. *Nano Lett.* **14**, 1381-1387 (2014).
- 13 Monkhorst, H. J. & Pack, J. D. Special points for Brillouin-zone integrations. *Phys. Rev. B* **13**, 5188-5192 (1976).
- 14 Kuisma, M., Ojanen, J., Enkovaara, J. & Rantala, T. T. Kohn-Sham potential with discontinuity for band gap materials, *Phys. Rev. B* **82**, 115106 (2010).

- 15 Castelli, I. E. *et al.* New Light - Harvesting Materials Using Accurate and Efficient Bandgap Calculations. *Adv. Energy Mater.* **5**, 1400915 (2015).
- 16 Mortensen, J. J., Hansen, L. B. & Jacobsen, K. W. Real-space grid implementation of the projector augmented wave method. *Phys. Rev. B* **71**, 035109 (2005).
- 17 Enkovaara, J. *et al.* Electronic structure calculations with GPAW: a real-space implementation of the projector augmented-wave method. *J. Phys.: Condens. Matter.* **22**, 253202 (2010).
- 18 Tsai, C., Chan, K., Abild-Pedersen, F. & Nørskov, J. K. Active edge sites in MoSe<sub>2</sub> and WSe<sub>2</sub> catalysts for the hydrogen evolution reaction: a density functional study. *Phys. Chem. Chem. Phys.* **16**, 13156-13164 (2014).
- 19 Tsai, C., Chan, K., Abild-Pedersen, F. & Nørskov, J. K. Theoretical Insights into the Hydrogen Evolution Activity of Layered Transition Metal Dichalcogenides. *Surf. Sci.* doi: 10.1016/j.susc.2015.01.019.
- 20 Bollinger, M. V., Jacobsen, K. W. & Nørskov, J. K. Atomic and electronic structure of MoS<sub>2</sub> nanoparticles. *Phys. Rev. B* **67**, 129906 (2003).
- 21 Mavrikakis, M., Hammer, B. & Nørskov, J. K. Effect of Strain on the Reactivity of Metal Surfaces. *Phys. Rev. Lett.* **81**, 2819-2822 (1998).
- 22 Li, H. *et al.* Optoelectronic crystal of artificial atoms in strain-textured MoS<sub>2</sub>. *Nat. Commun.* **6**:7381 doi: 10.1038/ncomms8381.
- 23 Komsa, H.-P., Kurasch, S., Lehtinen, O., Kaiser, U. & Krasheninnikov, A. From point to extended defects in two-dimensional MoS<sub>2</sub>: Evolution of atomic structure under electron irradiation. *Phys. Rev. B* **88**, 035301 (2013).
- 24 Li, H. *et al.* From Bulk to Monolayer MoS<sub>2</sub>: Evolution of Raman Scattering. *Adv. Funct. Mater.* **22**, 1385-1390 (2012).
- 25 Islam, M. R. *et al.* Tuning the electrical property via defect engineering of single layer MoS<sub>2</sub> by oxygen plasma. *Nanoscale* **6**, 10033-10039 (2014).
- 26 Wieting, T. J. & Verble, J. L. Infrared and Raman Studies of Long-Wavelength Optical Phonons in Hexagonal MoS<sub>2</sub>. *Phys. Rev. B* **3**, 4286-4292 (1971).
- 27 Quan, M. *et al.* Controlled argon beam-induced desulfurization of monolayer molybdenum disulfide. *J. Phys. Condens. Matter* **25**, 252201 (2013).
- 28 Tersoff, J. & Lang, N. D. in *Scanning Tunneling Microscopy*, vol. 27 of Methods in Experimental Physics, J. A. Stroscio, W. J. Kaiser (Academic Press, San Diego, 1993), 22-23.
